# Supplementary material for: Equity-centered digital health implementation: stratified patient-reported outcomes and usability of nurse-assisted teleconsultation in Brazil’s unified health system
Source: Research Square preprint supplement (doi:10.21203/rs.3.rs-8117637/v1), 2025-12-15
Supplement: Supplementary file 2 [file 56fba4b61d8f17d40ac3a211.docx]

**Table 4: Telehealth Usability Questionnaire responses (teleconsultation group, N=139)**

| Item | Agreement, n/N (%)* |
| --- | --- |
| Easy to use | 139/139 (100·0) |
| Increases access to care | 139/139 (100·0) |
| Felt comfortable during consultation | 139/139 (100·0) |
| Meets my healthcare needs | 138/139 (99·3) |
| Could easily communicate with physician | 138/139 (99·3) |
| Would use teleconsultation again | 138/139 (99·3) |
| Saves travel time | 136/139 (97·8) |
| Quality of care same as in-person | 135/139 (97·1) |
| Technical quality was adequate | 134/139 (96·4) |

**Agreement represents combined "agree" and "strongly agree" responses on 5-point Likert scales. The 100% "easy to use" rating is particularly noteworthy given the population's low educational attainment (96·5% [261 of 271] without higher education among those with known educational status), suggesting that nurse-assisted workflows successfully mitigated digital literacy barriers.*
