# Supplementary material for: Equity-centered digital health implementation: stratified patient-reported outcomes and usability of nurse-assisted teleconsultation in Brazil’s unified health system
Source: Research Square preprint supplement (doi:10.21203/rs.3.rs-8117637/v1), 2025-12-15
Supplement: Supplementary file 3 [file 9881ec339ff2e349311a6450.docx]

**Table 3: Dissatisfaction by digital-risk stratum (risk ratios comparing teleconsultation vs in-person care)**

| Domain | High risk (≤4th grade) | Moderate risk (high school) | Low risk (higher education) | P for interaction* |
| --- | --- | --- | --- | --- |
| Overall satisfaction |  |  |  |  |
| Teleconsultation | 0/61 (0%) | 5/68 (7·4%) | 1/5 (20·0%) | 0·42 |
| In-person | 6/66 (9·1%) | 7/65 (10·8%) | 1/5 (20·0%) |  |
| Risk ratio | 0·00 (··) | 0·69 (0·23–2·09) | 1·00 (0·09–11·37) |  |
| Sleep |  |  |  |  |
| Teleconsultation | 11/60 (18·3%) | 8/65 (12·3%) | 0/4 (0%) | 0·89 |
| In-person | 24/66 (36·4%) | 13/65 (20·0%) | 1/5 (20·0%) |  |
| Risk ratio | 0·48 (0·26–0·88) | 0·57 (0·28–1·18) | 0·00 (··) |  |
| Sexual life |  |  |  |  |
| Teleconsultation | 20/62 (32·3%) | 17/67 (25·4%) | 1/4 (25·0%) | 0·30 |
| In-person | 20/64 (31·3%) | 18/66 (27·3%) | 1/5 (20·0%) |  |
| Risk ratio | 1·03 (0·62–1·71) | 0·93 (0·52–1·66) | 1·25 (0·11–14·32) |  |
| Physical exercise |  |  |  |  |
| Teleconsultation | 23/61 (37·7%) | 17/68 (25·0%) | 0/4 (0%) | 0·02† |
| In-person | 18/65 (27·7%) | 23/67 (34·3%) | 2/5 (40·0%) |  |
| Risk ratio | 1·36 (0·82–2·26) | 0·73 (0·43–1·24) | 0·00 (··) |  |

*Data are n/N (%) unless otherwise indicated. N=271 (excludes seven participants with unknown/missing education). Risk ratios <1·0 favour teleconsultation. "0·00 (··)" indicates zero dissatisfaction events in the teleconsultation group (maximal protective effect; risk ratio and CI cannot be calculated). *From group × stratum interaction term in log-binomial models adjusted for age, sex, and diabetes duration. †Does not survive Bonferroni correction for seven domains (α=0·007); should be considered hypothesis-generating. All interaction tests had limited statistical power, particularly for the low-risk stratum (n=10, post-hoc power <30% for RR<2·5).*
