# Supplementary material for: Equity-centered digital health implementation: stratified patient-reported outcomes and usability of nurse-assisted teleconsultation in Brazil’s unified health system
Source: Research Square preprint supplement (doi:10.21203/rs.3.rs-8117637/v1), 2025-12-15
Supplement: Supplementary file 4 [file e722488f4777e6d3d35db321.docx]

**Table 1: Baseline characteristics**

| Characteristic | Teleconsultation (n=139) | In-person (n=139) | Total (N=278) |
| --- | --- | --- | --- |
| Demographics |  |  |  |
| Age, years | 60·1 (11·3) | 60·6 (10·7) | 60·3 (11·0) |
| Female sex | 79 (56·8%) | 84 (60·4%) | 163 (58·6%) |
| Education-based digital risk* |  |  |  |
| High risk (≤4th grade) | 64 (47·1%) | 68 (48·9%) | 132 (47·5%) |
| Moderate risk (high school) | 64 (47·1%) | 65 (46·8%) | 129 (46·4%) |
| Low risk (higher education) | 5 (3·7%) | 5 (3·6%) | 10 (3·6%) |
| Unknown/missing | 6 (4·3%) | 1 (0·7%) | 7 (2·5%) |
| Socioeconomic indicators |  |  |  |
| Monthly income ≤2 minimum wages† | 84 (60·4%) | 85 (61·2%) | 169 (60·8%) |
| No declared income | 21 (15·1%) | 20 (14·4%) | 41 (14·7%) |
| Clinical characteristics |  |  |  |
| Diabetes duration, years | 10·8 (8·2) | 11·4 (8·6) | 11·1 (8·4) |
| Baseline HbA₁c, % | 8·9 (1·8) | 9·0 (1·9) | 8·9 (1·9) |
| Body-mass index, kg/m² | 31·4 (5·8) | 31·1 (6·2) | 31·3 (6·0) |
| Comorbidities |  |  |  |
| Hypertension | 98 (70·5%) | 101 (72·7%) | 199 (71·6%) |
| Dyslipidaemia | 87 (62·6%) | 91 (65·5%) | 178 (64·0%) |

Data are mean (SD) or n (%). *N=271 for education-based stratification (excluding 7 participants with missing data). †Approximately US$530 per month in 2020–23.
