# Supplementary material for: Equity-centered digital health implementation: stratified patient-reported outcomes and usability of nurse-assisted teleconsultation in Brazil’s unified health system
Source: Research Square preprint supplement (doi:10.21203/rs.3.rs-8117637/v1), 2025-12-15
Supplement: Supplementary file 5 [file f9bfc4a44dfd84f337db8c49.docx]

**Table 2. Patient-reported satisfaction outcomes by treatment arm**

| Domain | In-person  Not sat n (%) | Teleconsultation  Not sat n (%) | Risk Ratio  (95% CI) | p-value | q-value† |
| --- | --- | --- | --- | --- | --- |
| Overall satisfaction | 14/136 (10.3) | 7/139 (5.0) | 0.49  (0.20-1.21) | 0.15 | 0.347 |
| Sleep | 37/136 (27.2) | 20/141 (14.2) | 0.52(0.32-0.85) | 0.008 | 0.047* |
| Social life | 8/134 (6.0) | 8/137 (5.8) | 0.98(0.38-2.50) | 0.99 | 0.99 |
| Sexual life | 39/135 (28.9) | 39/137 (28.5) | 0.99  (0.69-1.43) | 0.94 | 0.99 |
| Daily activities/work | 19/136 (14.0) | 17/133 (12.8) | 0.91(0.49-1.70) | 0.80 | 0.93 |
| Body image | 29/137 (21.2) | 25/132 (18.9) | 0.89 (0.55-1.45) | 0.65 | 0.91 |
| Physical exercise | 42/134 (31.3) | 41/138 (29.7) | 0.95 (0.66-1.36) | 0.77 | 0.91 |

*†Benjamini-Hochberg false discovery rate adjustment (q=0.05) applied across 7 domains. *Statistically significant after FDR correction (q<0.05). "Not satisfied" = "Not satisfied at all" on a 5-point Likert scale. Risk ratios <1.0 favor teleconsultation (lower dissatisfaction). Denominators vary by domain due to item-level nonresponse (range: 1.4%-4.3%). Raw p-values from Fisher's exact test.* *Complete response distribution (Very satisfied/Quite satisfied/Neither/Quite dissatisfied/ Not at all) available in Supplementary Table S4.*
