# Supplementary material for: Equity-centered digital health implementation: stratified patient-reported outcomes and usability of nurse-assisted teleconsultation in Brazil’s unified health system
Source: Research Square preprint supplement (doi:10.21203/rs.3.rs-8117637/v1), 2025-12-15
Supplement: Supplementary file 6 [file fd81c2f5de0e293b3faf2ce8.docx]

**Appendix**

**Supplementary methods**

**S1. Detailed randomization procedures:** Participants were randomized 1:1 to teleconsultation or in-person specialist care using a concealed, computer-generated sequence implemented in REDCap (22). Randomization was stratified by baseline HbA1c (<9% vs. ≥9%) and employed permuted blocks of random sizes (4, 6, and 8) to ensure allocation concealment.
Masking of patients and clinicians was not feasible due to the nature of the intervention; however, laboratory personnel and data analysts remained blinded to treatment allocation until the database was locked.

**S2. Laboratory monitoring protocol:** All participants underwent standardized laboratory evaluations at baseline, 3 months, and 6 months, performed at municipal SUS reference laboratories using standardized analytic procedures.
The following panels were assessed:

- Glycemic control: Fasting plasma glucose, HbA1c
- Renal function: Serum creatinine, estimated glomerular filtration rate (eGFR), urea
- Lipid profile: Total cholesterol, LDL-C, HDL-C, triglycerides
- Hematologic parameters: Complete blood count with differential

**S3. Education-Based Digital Risk Stratification:** Educational attainment was selected as the primary stratification variable for digital risk, justified by three factors: 1-Association with digital literacy: Brazilian national surveys demonstrate strong gradients in internet access (72% among those with elementary education vs. 98% with higher education), smartphone ownership (67% vs. 95%), and eHealth literacy (27,28), 2-Correlation with healthcare access: Lower education correlates with delayed diabetes diagnosis, reduced specialist referrals, and lower adherence rates in Brazilian cohorts (29) and 3-Pragmatic feasibility: Education data were complete for 97.5% of participants and easily operationalized within SUS information systems.

Limitations of this proxy:

- Fails to capture device ownership, connectivity stability, or caregiver digital support
- Does not reflect prior technology experience, sensory impairments, or cognitive barriers
- Urban predominance (97.3%) limits assessment of rural–urban digital divides

Future directions: Studies should include validated multidimensional indices (e.g., eHealth literacy scales), surveys on device ownership and connectivity, and measures of digital social support.

**S4. Post-hoc Dichotomization of Satisfaction Outcomes:** The original 5-point Likert satisfaction scale exhibited a strong ceiling effect, with 60–70% of responses falling into the “very satisfied” or “quite satisfied” categories. Post-hoc analysis revealed adequate variability only in the “not satisfied at all” category (5–31% across domains).
To maximize interpretability and power, responses were dichotomized as:

- Satisfied: “Very satisfied” or “quite satisfied”
- Not satisfied at all: “Not satisfied at all”

Intermediate categories were excluded to prioritize extreme dissatisfaction, which was considered the most clinically meaningful. A stringent Benjamini–Hochberg false discovery rate (FDR) correction (q = 0.05) was applied across seven domains. Complete 5-point distributions are presented in Supplementary Table S4.

**S5. Post-hoc Power for Interaction Analyses:** Using observed dissatisfaction rates and stratum sizes, post-hoc power was calculated for detecting *arm × stratum* interactions:

| Stratum | n | 80% Power (RR ≥ or ≤) | 50% Power (RR ≥ or ≤) |
| --- | --- | --- | --- |
| High risk | 132 | 2.5 / 0.4 | 1.8 / 0.55 |
| Moderate risk | 129 | 2.6 / 0.38 | 1.9 / 0.53 |
| Low risk | 10 | <30% for RR ≥2.5 | — |

*Interaction tests were adequately powered only for large effects in the high- and moderate-risk strata. The p = 0.02 finding for “Physical Exercise” should therefore be interpreted as hypothesis-generating, requiring replication in larger samples (≥50 per stratum) for 80% power at RR ≥1.5.*

**S6. Multiple Imputation for Missing Data**: Multiple imputation by chained equations (MICE) was pre-specified for sensitivity analysis of missing patient-reported outcomes (PROs).
Model details: Predictors: Baseline PRO score, arm, age, sex, diabetes duration, baseline HbA1c, education stratum, Methods: Predictive mean matching (continuous); logistic regression (binary), Iterations: 50 imputations × 20 iterations each, and Diagnostics: Trace plots and Gelman–Rubin statistics confirmed convergence

Findings from MICE analyses were consistent with the primary last-observation-carried-forward (LOCF) analyses, reinforcing the robustness of the main results.

**Table S1. Missing Data by Domain and Arm**

| Domain | In-person n (% missing) | Teleconsultation n (% missing) | p-value† |
| --- | --- | --- | --- |
| Overall satisfaction | 136/139 (2.2%) | 139/139 (0%) | 0.08 |
| Sleep | 136/139 (2.2%) | 141/141 (0%) | 0.06 |
| Social life | 134/139 (3.6%) | 137/141 (2.8%) | 0.71 |
| Sexual life | 135/139 (2.9%) | 137/141 (2.8%) | 0.99 |
| Activities/work | 136/139 (2.2%) | 133/141 (5.7%) | 0.12 |
| Body image | 137/139 (1.4%) | 132/141 (6.4%) | 0.03* |
| Physical exercise | 134/139 (3.6%) | 138/141 (2.1%) | 0.45 |

*†Fisher’s exact test. Body image showed higher missingness in the teleconsultation arm (6.4% vs. 1.4%), likely reflecting a measurement artifact rather than a treatment effect.*

**Table S2. Baseline Characteristics by Education-Based Stratum**

| Characteristic | High risk (n=132) | Moderate risk (n=129) | Low risk (n=10) | p-value |
| --- | --- | --- | --- | --- |
| Age, years (mean ± SD) | 62.1 ± 10.5 | 58.3 ± 11.2 | 59.4 ± 12.8 | 0.02* |
| Female, n (%) | 82 (62.1) | 72 (55.8) | 6 (60.0) | 0.54 |
| HbA1c baseline, % (±SD) | 8.9 ± 1.8 | 8.7 ± 1.9 | 8.5 ± 1.7 | 0.45 |
| Diabetes duration, years | 11.2 ± 7.3 | 9.8 ± 6.9 | 10.5 ± 8.1 | 0.23 |
| Income ≤2 MW, n (%) | 95 (72.0) | 68 (52.7) | 3 (30.0) | <0.001* |
| Urban residence, n (%) | 128 (97.0) | 127 (98.4) | 10 (100) | 0.55 |

*MW = minimum wages (~USD $265/month). *p < 0.05. High-risk participants were older and of lower socioeconomic status, supporting the notion that education serves as a proxy for socioeconomic vulnerability.*

**Table S3. CFIR/RE-AIM mapping of implementation determinants and actionable KPIs**

| Framework (domain) | Construct | Trial finding (evidence) | Implementation implication | Suggested KPI (example) |
| --- | --- | --- | --- | --- |
| CFIR (Intervention characteristics) | Relative advantage | 97.8% reported time savings; high comfort/ease (TUQ) | Strong value proposition supports adoption | ≥95% “agree/strongly agree” on TUQ time-saving & comfort items |
| CFIR (Intervention characteristics) | Complexity | TUQ 100% “easy to use” with nurse assistance; one-click join | Keep workflows low-friction with assisted setup | Median time-to-join ≤3 min; ≥95% first-attempt successful join |
| CFIR (Intervention characteristics) | Adaptability | PHC-embedded delivery with hybrid fallback | Maintain video→phone conversion & rapid rebooking | % sessions converted to phone; ≥80% rebooked ≤7 days after failure |
| CFIR (Inner setting) | Available resources | PHC tele-rooms; nurse rooming | Resource provision is equity-critical | Tele-room uptime ≥95%; nurse support hours per 100 visits (target ↓ over time) |
| CFIR (Inner setting) | Implementation climate/readiness | Multiple PHC sites ran clinics; SOPs implied | Build local capacity & standard operating procedures | % PHC sites with ≥1 clinic/week; staff training completion ≥90% |
| CFIR (Process) | Engaging / Executing | Nurse-assisted onboarding; SMS/voice reminders | Keep multimodal access and callbacks | No-show rate <15%; reminder coverage ≥95% |
| RE-AIM | Reach | High/Moderate digital-risk users predominated | Assisted design reaches vulnerable groups | Completion rate by stratum ≥85%; representation by stratum ~population |
| RE-AIM | Effectiveness | Sleep dissatisfaction reduced (q=0.047) | Pair modality gains with behavioral supports | RR (tele vs in-person) for “not satisfied” in Sleep <1.0; DQOL change (if available) |
| RE-AIM | Adoption | PHC-embedded delivery feasible | Expand provider/site onboarding | Active clinicians/month; site adoption ≥80% of eligible PHCs |
| RE-AIM | Implementation | One-click join; phone backup; rebooking | Track fidelity as routine KPIs | Protocol adherence ≥90%; technical failure rate <5% |
| RE-AIM | Maintenance | 6-month window (short) | Plan financing & digital-literacy supports | 12-mo retention ≥80%; cost per completed visit (local benchmark) |

***Legend.*** *CFIR = Consolidated Framework for Implementation Research; RE-AIM = Reach, Effectiveness, Adoption, Implementation, Maintenance; PHC = primary healthcare; TUQ = Telehealth Usability Questionnaire; SOP = standard operating procedures. KPIs should be stratified by digital risk stratum and monitored with FDR adjustment for multiple comparisons, where applicable.*

**Table S4: Patient-reported quality of life by arm (domain-specific counts)**

| Domain | In-person n | Very sat n (%) | Quite sat n (%) | Not satisfied n (%) | Tele n | Very sat n (%) | Quite sat n (%) | Not satisfied n (%) |
| --- | --- | --- | --- | --- | --- | --- | --- | --- |
| Overall satisfaction | 136 | 35 (25.7) | 39 (28.7) | 14 (10.3) | 139 | 28 (20.1) | 49 (35.3) | 7 (5.0) |
| Sleep | 136 | 27 (19.9) | 21 (15.4) | 37 (27.2) | 141 | 37 (26.3) | 32 (22.6) | 20 (14.2) |
| Social life | 134 | 53 (39.6) | 35 (26.1) | 8 (6.0) | 137 | 45 (32.8) | 45 (32.8) | 8 (5.8) |
| Sexual life | 135 | 25 (18.5) | 25 (18.5) | 39 (28.9) | 137 | 23 (16.9) | 25 (18.4) | 39 (28.5) |
| Daily activities/work | 136 | 39 (28.7) | 40 (29.4) | 19 (14.0) | 133 | 35 (26.3) | 33 (24.8) | 17 (12.8) |
| Body image | 137 | 22 (16.3) | 18 (13.3) | 29 (21.2) | 132 | 20 (15.2) | 27 (20.3) | 25 (18.9) |
| Physical exercise | 134 | 13 (9.7) | 23 (17.2) | 42 (31.3) | 138 | 16 (11.6) | 17 (12.3) | 41 (29.7) |

***Legend.*** *sat = satisfaction; tele = teleconsultation; n = number of respondents for that domain/arm. "Not satisfied" corresponds to "Not satisfied at all" on the 5-point Likert scale. Percentages are within-arm, within-domain. Domain-specific denominators vary due to item nonresponse. Multiplicity control applied using Benjamini-Hochberg FDR (q=0.05).*
